# Supplementary material for: Cell migration and growth induced by photo-immobilised vascular endothelial growth factor (VEGF) isoforms
Source: Royal Society of Chemistry journal article supplement (doi:10.1039/c9tb00407f), 2019-01-01
Supplement: c9tb00407f1.pdf [file c9tb00407f1.pdf]

## Supplementary Information: Journal of Materials Chemistry

### Cell migration and growth on photo-immobilized vascular endothelial growth factor (VEGF) isoforms

Xueli Ren,<sup>ab</sup> Jun Akimoto,<sup>a</sup> Hideyuki Miyatake,<sup>a</sup> Seiichi Tada,<sup>c</sup> Liping Zhu,<sup>a</sup> Hongli Mao,<sup>a</sup> Takashi Isoshima,<sup>a</sup> Stefan Müller,<sup>c</sup> Seong Min Kim,<sup>a</sup> Yulai Zhou,<sup>b</sup> and Yoshihiro Ito<sup>\*ac</sup>

<sup>a</sup> Nano Medical Engineering Laboratory, RIKEN Cluster for Pioneering Research, 2-1 Hirosawa, Wako, Saitama 351-0198, Japan. E-mail: y-ito@riken.jp; Phone: +81-48-467-5809; Fax: +81-48-467-9300

<sup>b</sup> School of Pharmaceutical Sciences, Jilin University, No.1266 Fujin Road, Changchun, Jilin, 130021, China

<sup>c</sup> Emergent Bioengineering Materials Research Team, RIKEN Center for Emergent Matter Science, 2-1 Hirosawa, Wako, Saitama 351-0198, Japan.

---

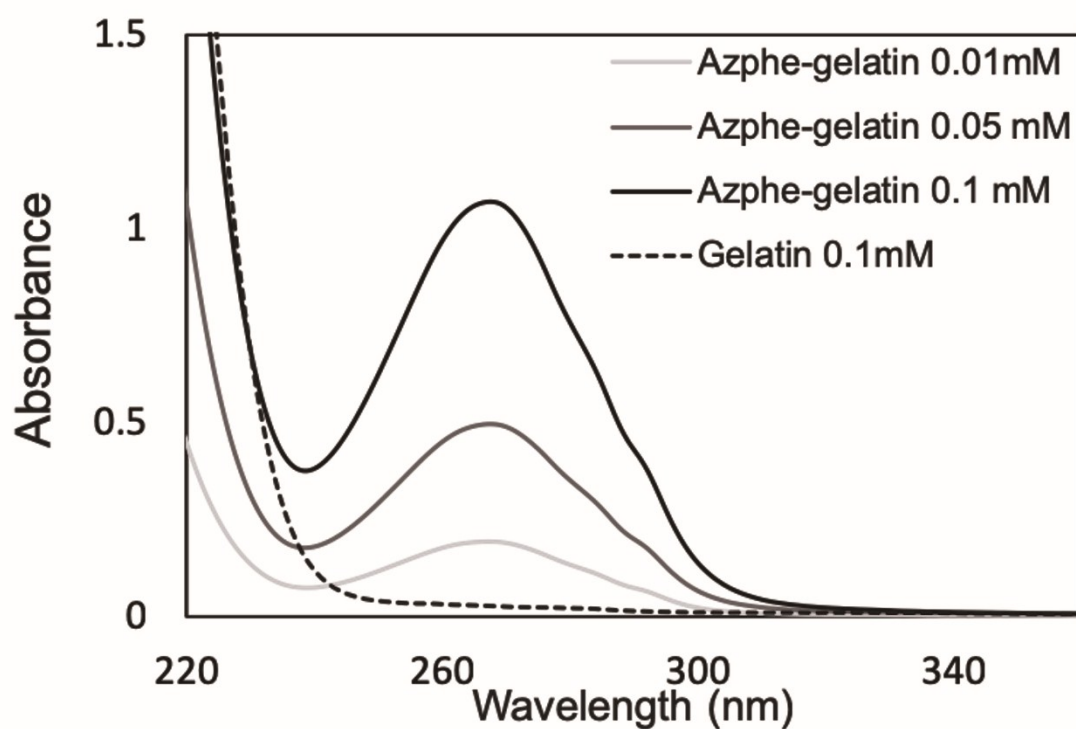

**Figure S1.** UV spectra of gelatin and Azphe-gelatin. The UV absorbance was measured at 220–320 nm. The phenyl azide group of Azphe-gelatin showed a specific absorbance at 270 nm, while there was no peak of gelatin solution (dashed line) at 270 nm. Hence, the phenyl azide group was successfully introduced into gelatin.

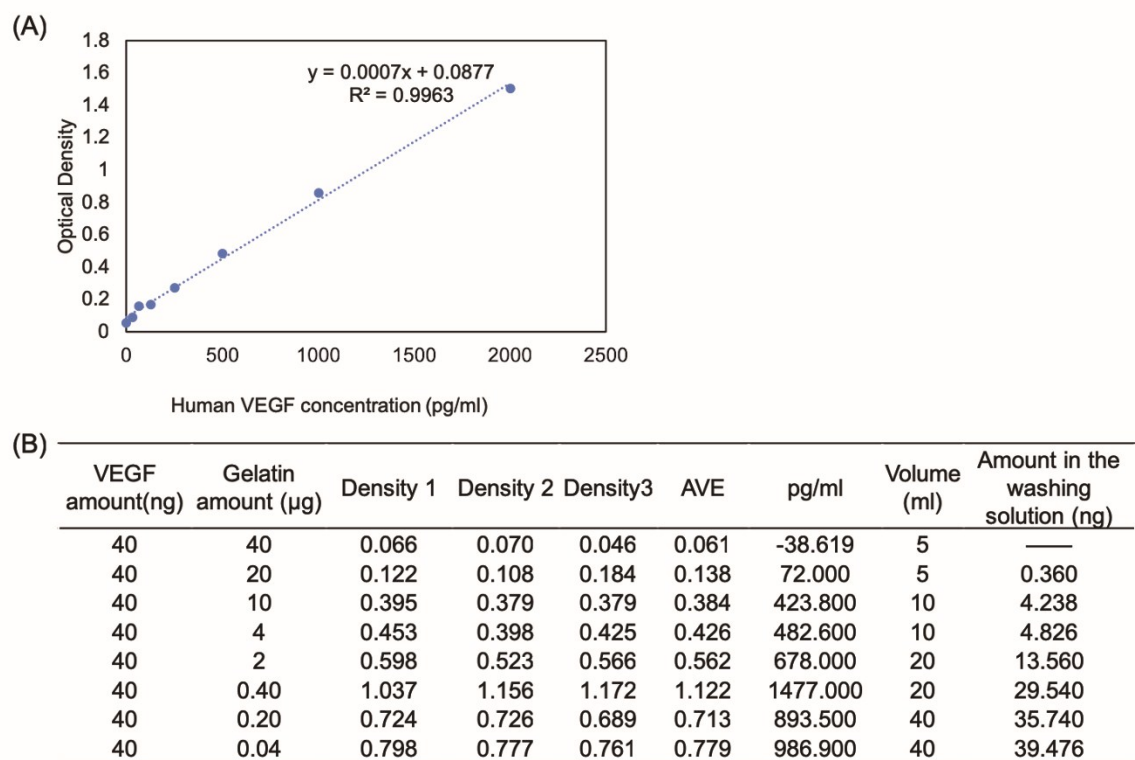

**Figure S2.** For quantitative determination of the VEGF concentration in the wash solution, a human VEGF ELISA kit was used. (A) The standard curve of measurement. (B) The calibration of the VEGF amount in the wash solution.

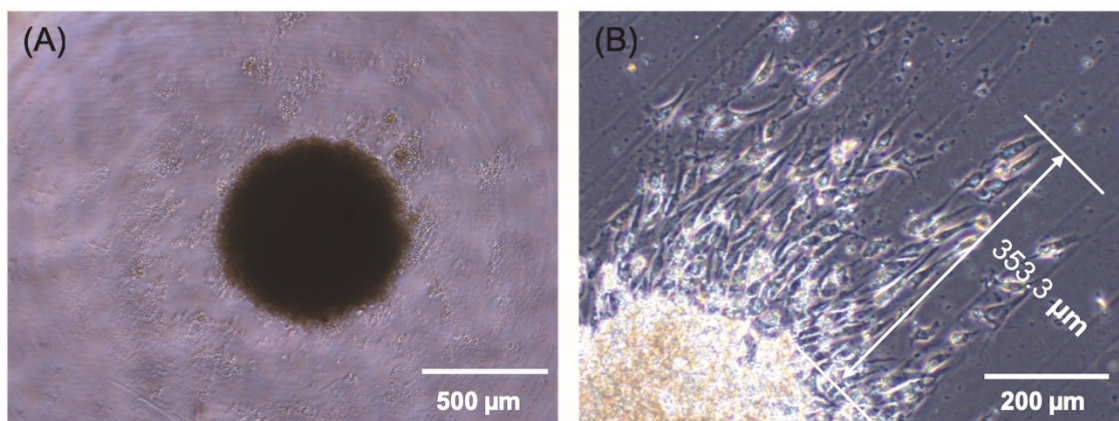

**Figure S3.** Spheroids sprouting assay. (A) After 5 days of culture in U-bottom plates, the diameter of the spheroids was more than 500 μm. (B) The spheroids were seeded on micropatterned surfaces. After 24 h of culturing, the length of the sprout was measured. The double-head arrow indicates the length of the longest sprout from the spheroid.

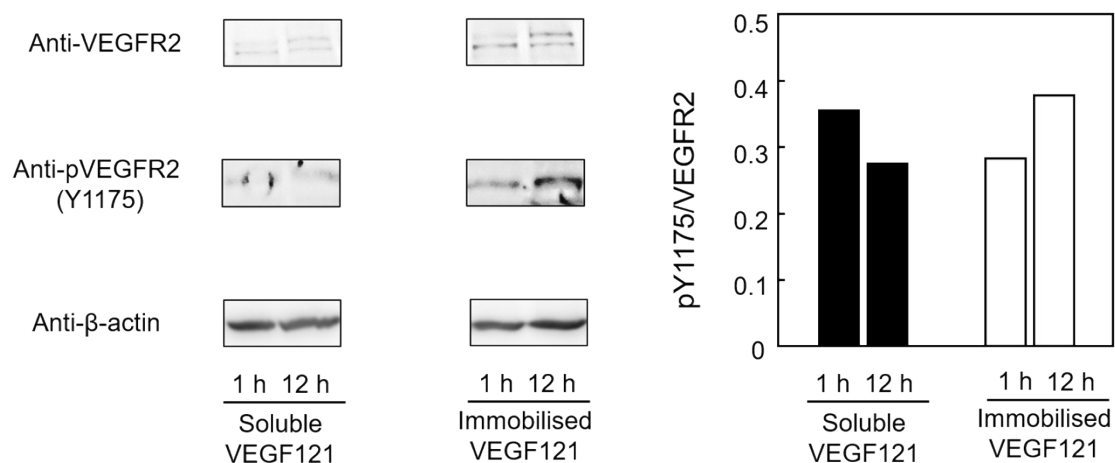

**Figure S4.** Activation of VEGF receptor 2 (VEGFR2Y1175) on HUVECs. Western blotting of VEGFR2 (220 kDa) and pVEGFR2 (Y1175). β-Actin was used as a loading control. Phosphorylated VEGFR2 induced by soluble or immobilised VEGF at 1 or 12 h of incubation. Band intensity was quantified by the CS analyser software. The results indicated that immobilised VEGF121 continuously stimulated VEGFR2, while soluble VEGF121 decreased its activity.
